# Supplementary material
Source: Research Square preprint supplement (doi:10.21203/rs.3.rs-9333785/v1)
Supplement: Supplementary file 1 [file 50f3ed5e9eb5fdeb0529b013.docx]

**Ultrasensitive Low-Temperature Sensor Based on Silver Nano-Film-Coated Dual-Polarization Photonic Crystal Fiber**

To address the urgent demand for ultrasensitive low-temperature measurement technology, this work proposes a novel D-shaped photonic crystal fiber (PCF) low-temperature sensor. The design leverages the surface plasmon resonance (SPR) effect, utilizing a silver nanofilm coating and polydimethylsiloxane (PDMS) as the thermo-sensitive material to enable precise temperature detection. The finite element method (FEM) is adopted to simulate and optimize key parameters, including silver nanofilm thickness, polishing depth, and semi-axial dimensions of the elliptical air holes. Simulation results show that within the temperature range of -35 ℃ to 0 ℃, the average wavelength sensitivity of the x-polarized mode in the 1200~2500 nm band ranges from 15.36 nm/℃ to 17.54 nm/℃, while that of the y-polarized mode in the 1200~2700 nm band ranges from 16.50 nm/℃ to 18.49 nm/℃. Featuring both high sensitivity and environmental adaptability, this low-temperature sensor can be widely applied in fields such as medical cryopreservation, polar environment monitoring, cold chain temperature control, and regulation of industrial low-temperature processes.


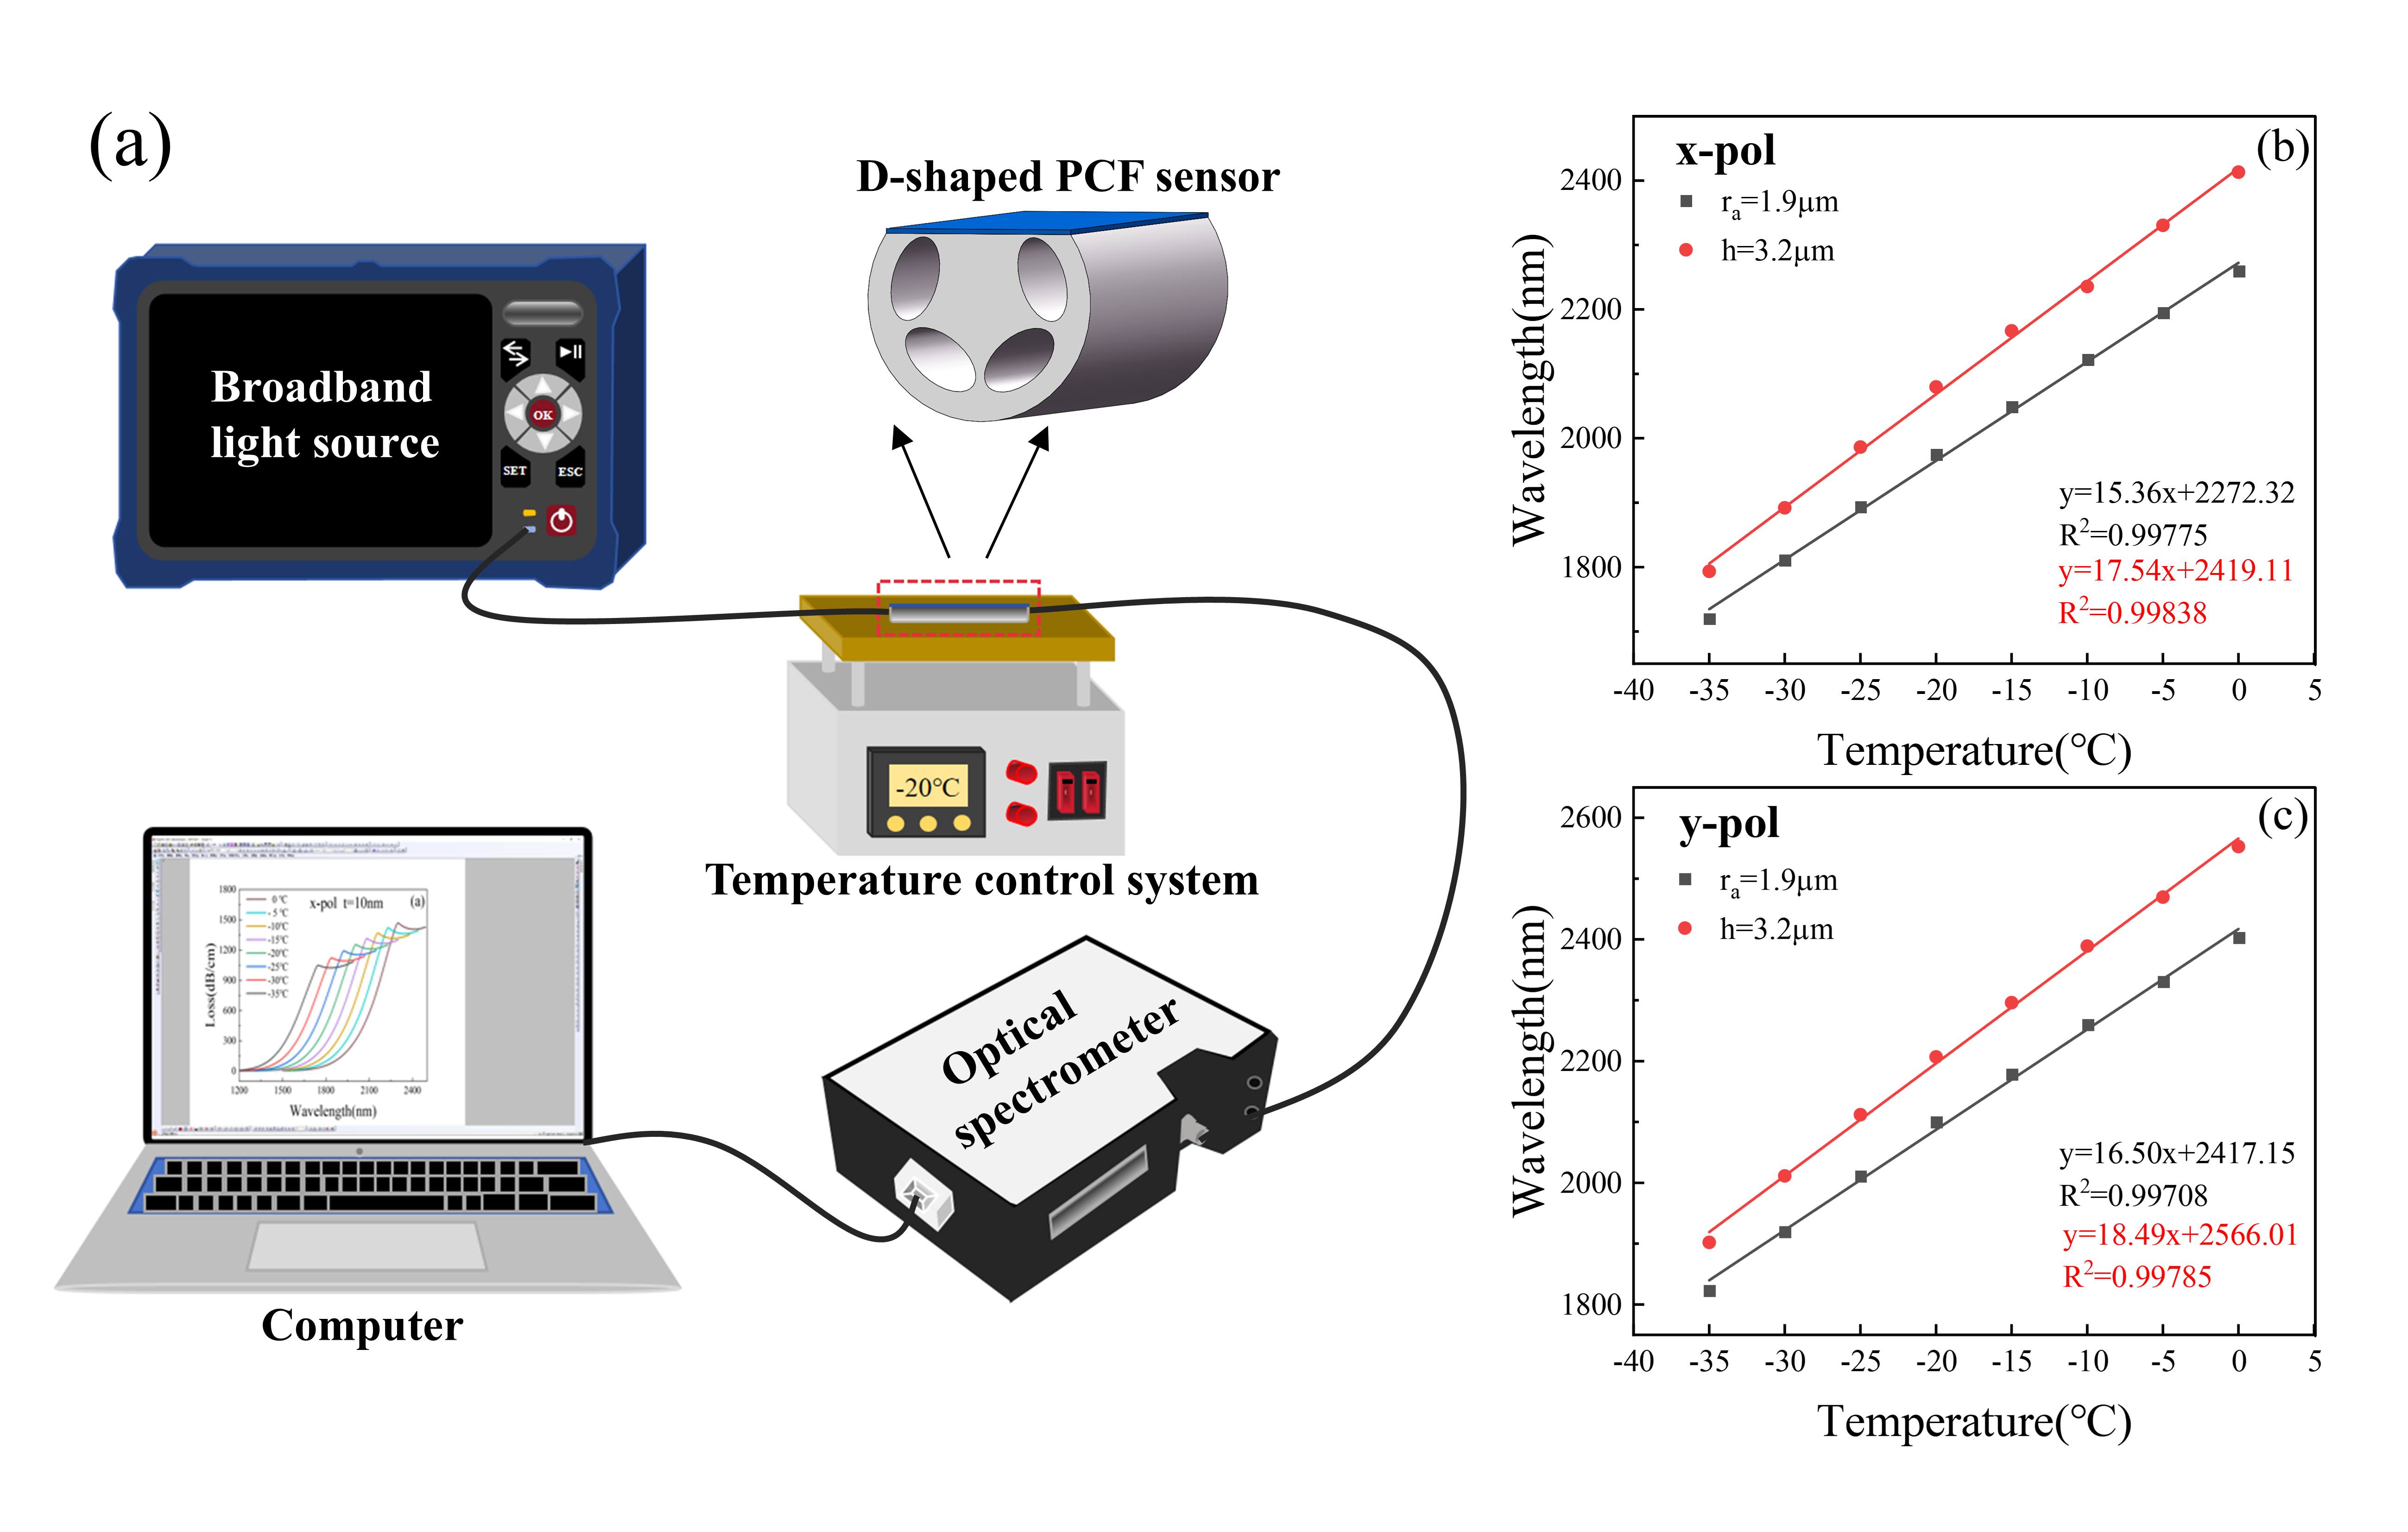


FIG. 1 (a) Test flow chart of the silver film-coated D-shaped PCF temperature sensor. (b) Linear fitting curve of temperature versus resonance wavelength for the x-polarized core mode of the sensor under corresponding structural parameters. (c) Linear fitting curve of temperature versus resonance wavelength for the y-polarized core mode of the sensor under corresponding structural parameters.
